# Supplementary material for: Reproducibility of the Ribosomal RNA Synthesis Ratio in Sputum and Association with Markers of Mycobacterium tuberculosis Burden
Source: PubMed Central journal article supplement (PMC8557932; doi:10.1128/spectrum.00481-21), 2021-09-08
Supplement: spectrum00481-21_supp_1_seq1.pdf [file spectrum00481-21_supp_1_seq1.pdf]

1 SUPPLEMENTAL MATERIAL

2  
3 **Reproducibility of the ribosomal RNA synthesis ratio in sputum and association with**  
4 **markers of *M. tuberculosis* burden**

5  
6 Emmanuel Musisi,<sup>1,2,3\*†</sup> Christian Dide-Agossou,<sup>4\*†</sup> Reem Al Mubarak,<sup>5,6</sup> Karen Rossmassler,<sup>5,6</sup>  
7 Abdul Wahab Ssesolo,<sup>1</sup> Sylvia Kaswabuli,<sup>1</sup> Patrick Byanyima,<sup>1</sup> Ingvar Sanyu,<sup>1</sup> Josephine  
8 Zawedde,<sup>1</sup> William Worodria,<sup>1</sup> Martin I Voskuil,<sup>7,8</sup> Rada M Savic,<sup>8,9,10,11</sup> Payam Nahid,<sup>8,10,11,12</sup>  
9 J. Lucian Davis,<sup>13</sup> Laurence Huang,<sup>10,11,14</sup> Camille M Moore,<sup>15</sup> Nicholas D Walter<sup>5,6,8</sup>

10  
11  
12 \* These authors contributed equally to this work (EM, CD-A)

13 † Corresponding authors (EM, CD-A)

14  
15  
16 **Table of Contents**

17 SUPPLEMENTAL METHODS ..... 2  
18 Bacteriological assays ..... 2  
19 Sputum processing for RNA assays ..... 3  
20 RNA extraction ..... 4  
21 Quantification of rRNA burden via RT-qPCR..... 4  
22 Quantification of RS Ratio via droplet digital PCR ..... 5  
23 SUPPLEMENTAL FIGURES & TABLES ..... 6  
24 FIG S1. Participant recruitment and sputum collection. .... 6  
25 FIG S2. Graphical representation of results presented in Table 3. .... 7  
26 TABLE S1. Associations of gender, HIV status and smoking with RS Ratio and markers of  
27 Mtb burden. .... 8  
28 REFERENCES ..... 9

31 SUPPLEMENTAL METHODS

32 **Bacteriological assays**

33 *Smear microscopy*

34 Auramine-O- fluorescent smear microscopy was done using direct method. A small  
35 amount of primary sputum was placed on a slide for the purpose of microscopic examination.  
36 Dried smears (1–2 cm) were stained for 15 mins using a 0.5% solution of auramine-O (Merck,  
37 Darmstadt, Germany), decolorized for 2 mins in 3% acid alcohol, and counterstained for 1 min in  
38 0.5% potassium permanganate solution. Smears were examined within 1h under a fluorescent  
39 microscope at 400 magnification. Sputum smear results were graded (negative, scanty, 1+, 2+,  
40 3+) according to the International Union Against Tuberculosis and Lung Disease guidelines (1).

41 *Liquid and solid cultures*

42 Sputum was homogenized mechanically by vortexing the sample with sterile beads.  
43 Decontamination was achieved by treating the homogenized sputum with equal volume of  
44 NaOH/N-acetyl L-cysteine (NALC) (*i.e.*, fresh 2% solution prepared with 2.9% trisodium citrate  
45 and 0.5 g NALC), neutralized with sterile PBS, pH 6.8, and centrifuged at 3000g for 20 min and  
46 the resulting pellet was resuspended in 2 ml of phosphate buffered saline before inoculating 1ml  
47 into the MGIT and solid culture media, respectively. Maximum incubation time for liquid culture  
48 (BACTEC MGIT 960 System; Becton Dickinson Franklin Lakes, NJ, USA) was 42 days.  
49 Results and time to culture positivity (TTP) were both instrument-determined. Positive MGIT  
50 tubes were cultured on blood agar to assess for contaminating bacteria. For solid culture on  
51 Lowenstein–Jensen (LJ), incubation was at 37°C for a maximum of 56 days. Solid cultures with  
52 visible contaminants were recorded as contaminated.

53 *Xpert MTB/RIF*

54 One ml of the sputum was added to 2 ml of sample reagent buffer and incubated at room  
55 temperature, shaking intermittently to ensure complete sputum lysis. 2 ml of the mucolyzed  
56 sample were then used for Xpert testing per the raw sputum procedure in the Xpert package  
57 insert. Processed sputa were immediately loaded into individual Xpert cartridges and tested on  
58 the Xpert machine. Cycle threshold (CT) values of five probes targeting the *rpoB* gene were  
59 recorded. As described elsewhere, the mean CT value of all five probes was used as a measure of  
60 bacillary burden (2).

### 61 **Sputum processing for RNA assays**

62 Sputum collection and laboratory assays were as previously described (3) with slight  
63 modifications. Briefly, two spontaneously expectorated sputa were collected into RNA-  
64 preservative composed of 5M GTC, 10 mM (Tris(2-carboxyethyl)phosphine) (TCEP); 25 mM  
65 sodium citrate, 0.5% N-lauroyl sarcosine, sodium salt; 1.0% Tween-80; 0.02% Antifoam A; 100  
66 mM Tris-HCl; 0.1 mM EDTA; and 23% ethanol. Sputa were homogenized by vortexing with  
67 sterile beads and stored at  $-80^{\circ}\text{C}$  for 8 months before they were shipped on dry ice to the  
68 University of Colorado for subsequent molecular laboratory assays.

69 Thawed sputum-GTC-TCEP mixture was transferred into two pre labeled sterile 15 ml  
70 Falcon tubes leaving the glass beads in the original 50 ml Falcon tube. The 15 ml Falcon tubes  
71 containing the sputum-GTC-TCEP mixture were centrifuged for 30 minutes at 3000 RPM. The  
72 supernatant was removed leaving approximately 200  $\mu\text{L}$  of the GTC-TCEP with the pellet.  
73 Pellets from both 15 ml Falcon tubes were resuspended and combined in one 1.5 ml tube and  
74 centrifuged for 3 minutes at 8800 RCF. The resulting supernatant was discarded, and the pellet  
75 resuspended by vortexing in 1 ml Trizol before RNA extraction was done.

76 **RNA extraction**

77 Tubes containing sputum/Trizol mixture were homogenized prior to RNA extraction and  
78 RNA was extracted using the phenol/chloroform method as previously described <sup>1</sup>. Briefly, 0.4  
79 ml of 0.1 mm silica beads (Matrix B) (MP Biomedicals, #116911050) were added to each tube  
80 and the sample was homogenized thrice for 30 seconds at 6M/second on the Fastprep24 bead-  
81 beater (MP Biomedicals). After the homogenization, the RNA was extracted with chloroform  
82 and centrifuged for 10 minutes at 20800g. The aqueous phase was transferred to a new tube and  
83 precipitated overnight a volume of isopropanol equal to the aqueous phase volume with 1:10  
84 volume of 5M ammonium acetate. The RNA was washed twice with 70% ethanol, then purified  
85 using the Maxwell RSC simply RNA tissue kit on the Maxwell RSC instrument (Promega)  
86 following the protocol described by Promega (Maxwell RSC simply RNA Tissue Kit, Promega).  
87 For every batch, a negative extraction control was included to test for cross-contamination  
88 between samples, and 2 µl of extraction control to track RNA extraction efficiency (ERCC) was  
89 added to each sample (4).

90 **Quantification of rRNA burden via RT-qPCR**

91 rRNA burden was expressed as the absolute count of 16S or 23S rRNA gene transcript  
92 copies adjusted for RNA extraction efficiency, dilution factors, and sputum weight. RNA  
93 extraction efficiency was tracked using RNA retention percentage. After extraction, RNA was  
94 reverse transcribed, and the resulting cDNA was diluted to 1:10. Then, 4 µL of the diluted cDNA  
95 was used as input in a RT-qPCR step for the quantification of rRNA burden. Concurrently, two  
96 templates in the ERCC mix were targeted by RT-qPCR (ERCC002 and ERCC130), the ERCC  
97 primers were at 300 nM final concentration, and the probes were at 100 nM final concentration

98 (4). RNA retention percentage was calculated by taking the inverse of the fold change between  
99 the CT values of the specimen and the control.

#### 100 **Quantification of RS Ratio via droplet digital PCR**

101 RNA was reverse transcribed with SuperScript VILO cDNA synthesis kit (Invitrogen)  
102 according to the manufacturer's protocol, except that reverse transcription at 42°C was  
103 performed for 120 minutes. Each sample was split into approximately into ~20,000 droplets  
104 using either manual droplet generator (QX200, Bio-Rad) or auto droplet generator (AutoQX200,  
105 Bio-Rad). Transcript copies were quantified using the QX200 Droplet Digital PCR system (Bio-  
106 Rad). The primers/probes sequences and thermocycling conditions have been previously  
107 published (4). Reaction were run in duplex, ETS1 with 23S with ddPCR SuperMix for Probes  
108 (no dUTP) (Bio-Rad). All primers were 900 nM final concentration and all probes were 250 nM  
109 final concentration. The thermocycling conditions for all ddPCR reactions were: initial  
110 denaturation at 95°C for 10 minutes, 40 cycles of 94°C for 30 seconds and 60°C for 60 seconds  
111 with a 2°C/second ramp rate, and a final hold at 98°C for 10 minutes. RS Ratio estimates were  
112 calculated within each duplexed reaction by the QX200 ddPCR system (QuantaSoft software)  
113 (Bio-Rad).

114

## SUPPLEMENTAL FIGURES & TABLES

115

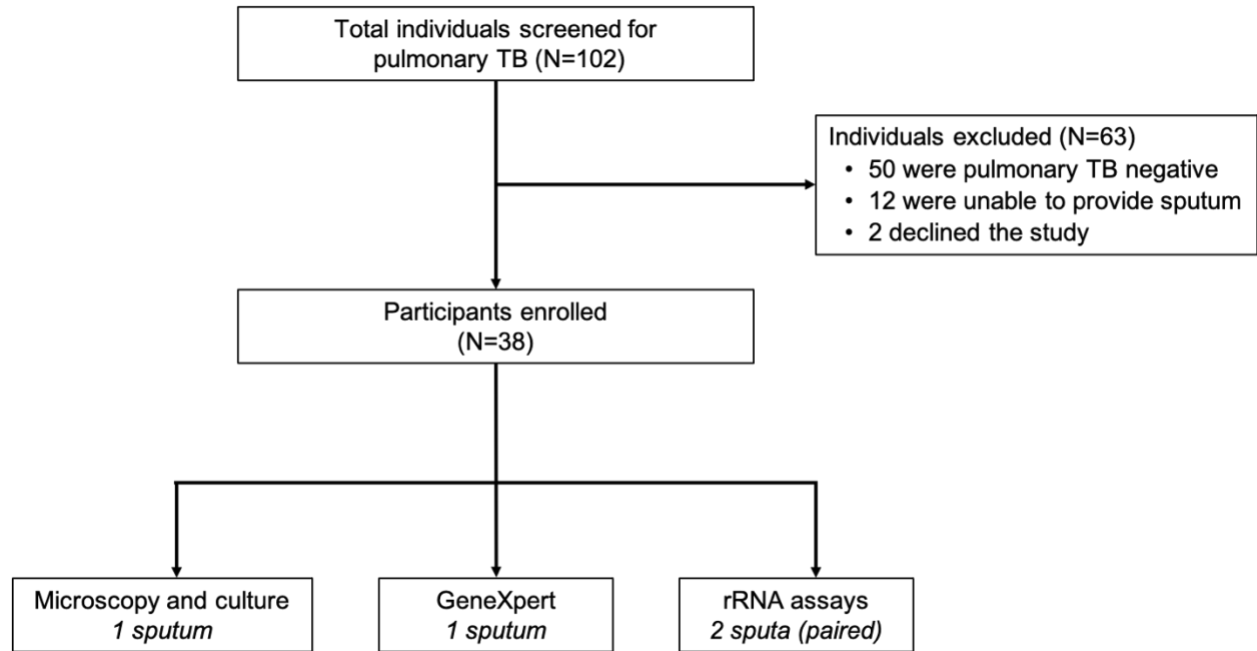

116

117 **FIG S1.** Participant recruitment and sputum collection.

118 A total of 38 participants with drug-susceptible pulmonary were enrolled. Each patient provided 4  
119 sputum specimens.

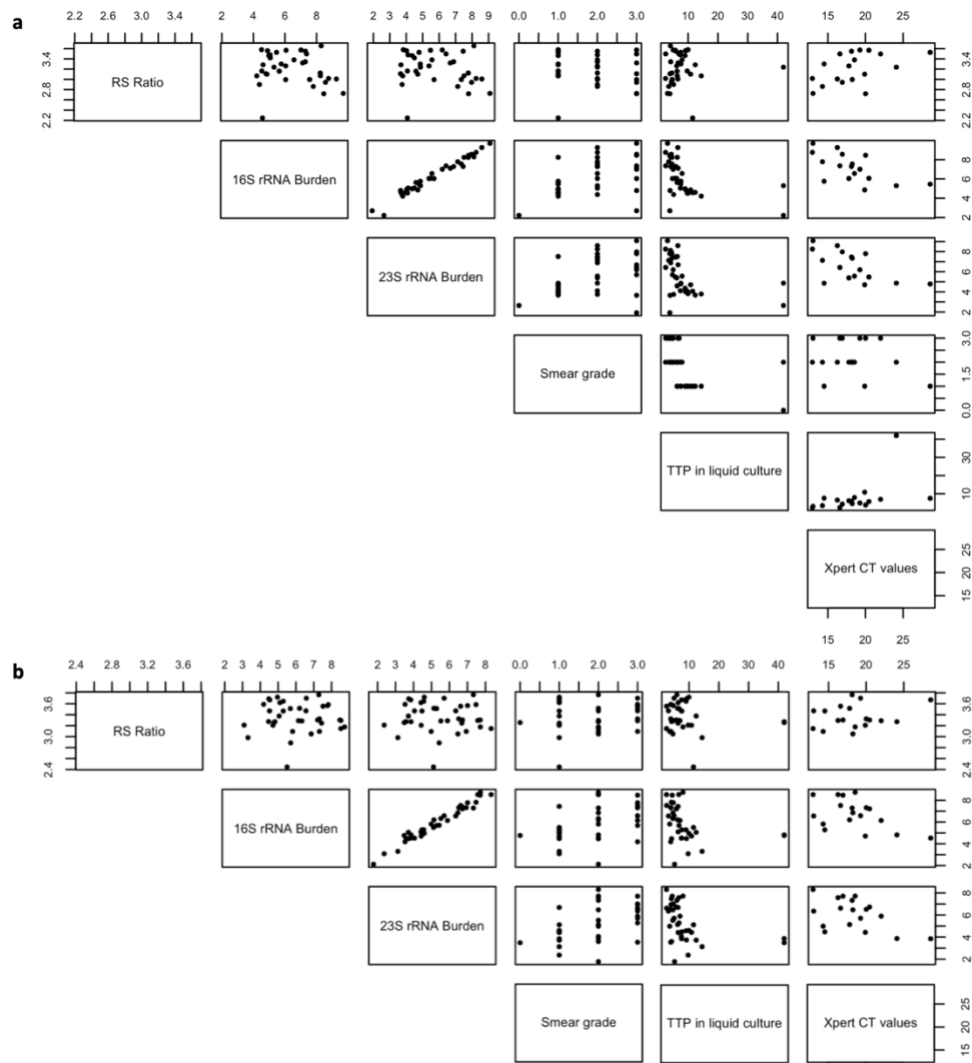

120

121 **FIG S2.** Graphical representation of results presented in Table 3.

122 Association between the RS Ratio in SS1 (a) or SS2 (b) and markers of *Mtb* burden (16S and 23S rRNA burden, smear grade TTP and

123 Xpert CT value).

124 **TABLE S1.** Associations of gender, HIV status and smoking with RS Ratio and markers of *Mtb*  
 125 burden.  
 126 Associations were tested using two-sample Wilcoxon tests. P-values are shown.  
 127

|                              | <i>Sex</i><br>(Male vs. Female) | <i>HIV status</i><br>(Negative vs. Positive) | <i>Smoking</i><br>(non-smokers vs. smokers) |
|------------------------------|---------------------------------|----------------------------------------------|---------------------------------------------|
| <i>RS Ratio</i>              | 0.16                            | 0.54                                         | 0.62                                        |
| <i>16S burden</i>            | 0.67                            | 0.60                                         | 0.89                                        |
| <i>23S burden</i>            | 0.64                            | 0.76                                         | 0.85                                        |
| <i>Smear grade</i>           | 0.23                            | 0.32                                         | 0.17                                        |
| <i>TTP in liquid culture</i> | 0.56                            | 0.21                                         | 0.68                                        |
| <i>Xpert CT values</i>       | 0.03                            | 0.57                                         | 0.82                                        |

128



129 **REFERENCES**

- 130 1. Tuberculosis Division, International Union Against Tuberculosis and Lung Disease,  
131 Tuberculosis bacteriology—priorities and indications in high prevalence countries:  
132 position of the technical staff of the Tuberculosis Division of the International Union  
133 Against Tuberculosis and Lung Disease, *Int. Union Tuberc. Lung Dis.* **Volume 9** (2005)  
134 355-361(7).
- 135 2. C. F. Hanrahan, G. Theron, J. Bassett, K. Dheda, L. Scott, W. Stevens, I. Sanne and A. Van  
136 Rie, Xpert MTB/RIF as a Measure of Sputum Bacillary Burden. Variation by HIV Status  
137 and Immunosuppression, *Am. J. Respir. Crit. Care Med.* **189** (2014) 1426–1434.;  
138 DOI:10.1164/rccm.201312-2140OC
- 139 3. N. D. Walter, B. C. de Jong, B. J. Garcia, G. M. Dolganov, W. Worodria, P. Byanyima, E.  
140 Musisi, L. Huang, E. D. Chan, T. T. Van, M. Antonio, A. Ayorinde, M. Kato-Maeda, P.  
141 Nahid, A. M. Leung, A. Yen, T. E. Fingerlin, K. Kechris, et al., Adaptation of  
142 *Mycobacterium tuberculosis* to Impaired Host Immunity in HIV-Infected Patients, *J.*  
143 *Infect. Dis.* **214** (2016) 1205–1211.; DOI:10.1093/infdis/jiw364
- 144 4. N. D. Walter, S. E. M. Born, G. T. Robertson, M. Reichlen, C. Dide-Agossou, V. A.  
145 Ektnitphong, K. Rossmassler, M. E. Ramey, A. A. Bauman, V. Ozols, S. C. Bearrows, G.  
146 Schoolnik, G. Dolganov, B. Garcia, E. Musisi, W. Worodria, L. Huang, J. L. Davis, et al.,  
147 *Mycobacterium tuberculosis* precursor rRNA as a measure of treatment-shortening  
148 activity of drugs and regimens, *Nat. Commun.* **12** (2021) 2899.; DOI:10.1038/s41467-  
149 021-22833-6

150
